# Supplementary material
Source: Elsevier journal article supplement (https://www.sciencedirect.com/science/article/pii/S0325754117301372)
Supplement: mmc1 [file S0325754117301372:mmc1.docx]

Supplementary Table 1: Socio-cultural characteristics of the population studied

| Variable | CIN 1 | CIN 2/3 | Cancer | Total |
| --- | --- | --- | --- | --- |
| Age |  |  |  |  |
| Range | 16 – 82 | 21 - 79 | 32 – 85 | 16 – 82 |
| Mean; Median; Standard Deviation | 38.5; 35.0; 13.6 | 45.9; 42.0; 15.0 | 55.9; 56.0; 15.0 | 42.4; 38.0; 14.5 |
|  |  |  |  |  |
| Menarche |  |  |  |  |
| Range | 9 - 18 | 10 - 18 | 11 – 16 | 10 – 18 |
| Mean; Median; Standard Deviation | 12.9; 13.0; 1.5 | 13.5; 13.0; 1.7 | 13.8; 14.0; 1.8 | 13.3; 13.0; 1.6 |
|  |  |  |  |  |
| Age First Sexual Intercourse |  |  |  |  |
| Range | 13 - 30 | 12 - 27 | 14 – 20 | 12 – 30 |
| Mean; Median; Standard Deviation | 18.5; 17.5; 3.7 | 17.5; 17.0; 3.1 | 16.3; 16.0; 1.5 | 17.7; 17.0; 3.3 |
|  |  |  |  |  |
| Pregnanciesa |  |  |  |  |
| Range | 0 – 12 | 0 - 13 | 0 - 17 | 0 -17 |
| Mean; Median; Standard Deviation | 3.8; 3.0; 2.8 | 4.5; 4.0; 7.4 | 6.7; 6.0; 4.8 | 4.4; 4.0; 3.0 |
|  |  |  |  |  |
| Educationa |  |  |  |  |
| Elementary School | 18 (31.6) | 51 (53.7) | 10 (71.4) | 79 (47.6) |
| High School | 22 (38.6) | 43 (45.3) | 4 (28.6) | 69 (41.6) |
| University | 17 (29.8) | 1 (1.1) | 0 (0) | 18 (10.8) |
|  |  |  |  |  |
| Marital Status |  |  |  |  |
| Single | 16 (28.1) | 28 (29.5) | 3 (21.4) | 47 (28.3) |
| Married | 27 (47.4) | 29 (30.5) | 4 (28.6) | 60 (36.1) |
| Other (widow, divorced) | 14 (24.6) | 38 (40.0) | 7 (50.0) | 59 (35.5) |
|  |  |  |  |  |
| Employeda | 18 (31.6) | 17 (17.9) | 0 (0) | 35 (21.1) |
| Unemployed (Housewives) | 36 (63.2) | 75 (78.9) | 14 (100) | 125 (75.3) |
| Student | 3 (5.3) | 3 (3.2) | 0 (0) | 6 (3.6) |
|  |  |  |  |  |
| History of STDs |  |  |  |  |
| Yes | 19 (50.0) | 18 (45.0) | 2 (50.0) | 39 (47.6) |
| No | 19 (50.0) | 22 (55.0) | 2 (50.0) | 43 (52.4) |

a The distribution is statistically significant.
