# Supplementary material
Source: Elsevier journal article supplement (https://www.sciencedirect.com/science/article/pii/S0325754117301372)
Supplement: mmc2 [file S0325754117301372:mmc2.docx]

Supplementary Table 2: HPV58 variants identified in Ecuadorian women with cervical lesions

| Positiona | 6  6  4  1 | 6  6  8  3 | 6  6  9  2 | 6  6  9  7 | 6  7  1  1 | 6  7  9  8 | 6  8  2  2 | 6  8  2  7 | 6  8  2  8 | 6  8  8  1 | 6  9  2  6 | 7  0  0  0 | 7  0  1  0 | 7  0  1  6 | Lineage | SubLineage | Cervical Lesion |
| --- | --- | --- | --- | --- | --- | --- | --- | --- | --- | --- | --- | --- | --- | --- | --- | --- | --- |
| Consensus | G | A | G | G | G | A | G | C | A | A | A | A | A | A |  |  |  |
| D90400 | . | . | . | . | . | . | . | . | . | . | . | . | . | . | A | A1 |  |
| HQ537752 | A | . | . | . | . | . | . | . | . | . | . | . | . | . | A | A2 |  |
| HQ537758 | . | G | . | . | . | . | . | A | . | G | . | . | . | . | A | A3 |  |
| HQ537762 | . | . | . | . | . | G | A | A | G | . | . | . | . | . | B | B1 |  |
| HQ537764 | . | . | . | . | . | G | A | A | G | . | . | . | . | . | B | B2 |  |
| HQ537774 | . | . | A | A | A | G | A | A | G | . | . | . | . | G | C |  |  |
| HQ537768 | . | . | . | . | . | . | A | A | G | . | . | . | G | G | D | D1 |  |
| HQ537770 | . | . | A | . | . | G | A | A | G | . | . | . | G | G | D | D2 |  |
| ECU-37 | A | . | . | . | . | . | . | . | . | . | . | . | . | . | A | A2 | CIN1 |
| ECU-38 | A | . | . | . | . | . | . | . | . | . | . | . | . | . | A | A2 | CIN1 |
| ECU-39 | A | . | . | . | . | . | . | . | . | . | . | . | . | . | A | A2 | CIN1 |
| ECU-40 | A | . | . | . | . | . | . | . | . | . | . | . | . | . | A | A2 | CIN1 |
| ECU-41 | A | . | . | . | . | . | . | . | . | . | . | . | . | . | A | A2 | CIN1 |
| ECU-42 | A | . | . | . | . | . | . | . | . | . | . | . | . | . | A | A2 | in situ |
| ECU-43 | A | . | . | . | . | . | . | . | . | . | . | . | . | . | A | A2 | Invasive |
| ECU-44 | A | . | . | . | . | . | . | . | . | . | . | . | . | . | A | A2 | CIN2/3 |
| ECU-45 | A | . | . | . | . | . | . | . | . | . | . | . | . | . | A | A2 | CIN2/3 |
| ECU-46 | . | . | . | . | . | . | . | A | . | . | . | . | . | . | A | A3 | CIN2/3 |
| ECU-47 | . | . | . | . | . | . | . | A | . | . | G | . | . | . | A | A3 | CIN2/3 |
| ECU-48 | A | . | . | . | . | . | . | . | . | . | . | C | . | . | A | A2 | CIN2/3 |
| ECU-49 | . | . | . | . | . | . | . | A | . | . | G | . | . | . | A | A3 | CIN2/3 |
| ECU-50 | A | . | . | . | . | . | . | . | . | . | . | . | . | . | A | A2 | CIN2/3 |
| ECU-51 | A | . | . | . | . | . | . | . | . | . | . | . | . | . | A | A2 | CIN2/3 |

1. Nucleotide positions of mutations detected within MY09/MY11 L1 region are written vertically across the top. Absence of genetic variations relative to the prototype is marked with points, whereas presence of a variant nucleotide is indicated by the nucleotide corresponding letter. A question mark (?) indicates missing data for the position.

Supplementary Table 2: HPV16 variants identified in Ecuadorian women with cervical lesions.

| Positiona | 6  6  1  4 | 6  6  8  5 | 6  6  9  5 | 6  7  2  1 | 6  8  0  3 | 6  8  2  6 | 6  8  5  4 | 6  8  6  2 | 6  8  6  5 | 6  9  7  0 | 6  9  9  4 | Lineage | Sublineage | Other Names | Cervical Lesion |
| --- | --- | --- | --- | --- | --- | --- | --- | --- | --- | --- | --- | --- | --- | --- | --- |
| HPV16|Ref | G | T | A | G | A | C | C | T | C | C | G |  |  |  |  |
| KO2718 | . | . | . | . | . | . | . | . | . | . | . | A | A1 | European |  |
| AF536179 | . | . | . | . | . | . | . | C | . | . | A | A | A2 | European |  |
| HQ644236 | . | . | . | . | . | T | . | . | . | . | . | A | A3 | European |  |
| AF534061 | . | . | . | . | . | . | . | . | . | . | . | A | A4 | Asian, E(As) |  |
| AF536180 | . | . | . | A | . | . | T | . | . | T | A | B | B1 | Afr 1a |  |
| HQ644298 | . | A | . | A | . | . | T | . | . | T | A | B | B2 | Afr 1b |  |
| AF472509 | . | . | C | A | . | . | T | . | T | T | A | C |  | Afr 2a |  |
| HQ644257 | . | . | C | A | . | . | T | . | T | T | A | D | D1 | NA 1 |  |
| AY686579 | . | . | C | A | . | . | T | C | T | T | A | D | D2 | AA2 |  |
| AF402678 | . | . | C | A | T | . | T | . | T | T | A | D | D3 | AA1 |  |
| ECU-53 | . | . | C | A | . | . | T | C | T | T | A | D | D2 | AA2 | CIN2/3 |
| ECU-52 | . | . | C | A | . | . | T | C | T | T | A | D | D2 | AA2 | CIN1 |
| ECU-54 | . | . | C | A | . | . | T | C | T | T | A | D | D2 | AA2 | in situ |
| ECU-55 | . | . | C | A | . | . | T | C | T | T | A | D | D2 | AA2 | invasive |
| ECU-56 | . | . | C | A | . | . | T | C | T | T | A | D | D2 | AA2 | CIN1 |
| ECU-57 | . | . | C | A | T | . | T | . | T | T | A | D | D3 | AA1 | in situ |
| ECU-58 | . | . | C | A | T | . | T | . | T | T | A | D | D3 | AA1 | In situ |
| ECU-59 | . | . | C | A | T | . | T | . | T | T | A | D | D3 | AA1 | Cancer |
| ECU-100 | . | . | C | A | T | . | T | . | T | T | A | D | D3 | AA1 | Cancer |
| ECU-101 | . | . | C | A | T | . | T | . | T | T | A | D | D3 | AA1 | CIN2/3 |
| ECU-102 | . | . | C | A | T | . | T | . | T | T | A | D | D3 | AA1 | CIN2/3 |
| ECU-103 | . | . | C | A | T | . | T | . | T | ? | ? | D | D3 | AA1 | Cancer |
| ECU-104 | ? | ? | ? | ? | ? | . | . | . | . | . | . | A |  |  | CIN1 |
| ECU-105 | ? | ? | ? | ? | . | . | . | . | . | . | . | A |  |  | CIN1 |
| ECU-20 | . | . | . | . | . | . | . | . | . | . | . | A |  |  | Invasive |
| ECU-49 | . | . | . | . | . | . | . | . | . | . | . | A |  |  | CIN2/3 |
| ECU-50 | . | . | . | . | . | . | . | . | . | . | . | A |  |  | CIN2/3 |
| ECU-60 | . | . | . | . | . | . | . | . | . | . | . | A |  |  | CIN2/3 |
| ECU-61 | . | . | . | . | . | . | . | . | . | . | . | A |  |  | CIN2/3 |
| ECU-62 | . | . | . | . | . | . | . | . | . | . | . | A |  |  | In situ |
| ECU-63 | . | . | . | . | . | . | . | . | . | . | . | A |  |  | In situ |
| ECU-64 | . | . | . | . | . | . | . | . | . | . | . | A |  |  | CIN2/3 |
| ECU-65 | . | . | . | . | . | . | . | . | . | . | . | A |  |  | In situ |
| ECU-66 | . | . | . | . | . | . | . | . | . | . | . | A |  |  | Invasive |
| ECU-67 | . | . | . | . | . | . | . | . | . | . | . | A |  |  | Invasive |
| ECU-68 | . | . | . | . | . | . | . | . | . | . | . | A |  |  | In situ |
| ECU-69 | . | . | . | . | . | . | . | . | . | . | . | A |  |  | In situ |
| ECU-70 | . | . | . | . | . | . | . | . | . | . | . | A |  |  | In situ |
| ECU-71 | T | . | . | . | . | . | . | . | . | . | . | A |  |  | In situ |
| ECU-72 | . | . | . | . | . | . | . | . | . | . | . | A |  |  | CIN1 |
| ECU-73 | . | . | . | . | . | . | . | . | . | . | . | A |  |  | Cancer |
| ECU-74 | . | . | . | . | . | . | . | . | . | . | . | A |  |  | CIN2/3 |
| ECU-75 | . | . | . | . | . | . | . | . | . | . | . | A |  |  | CIN2/3 |
| ECU-76 | . | . | . | . | . | . | . | . | . | . | . | A |  |  | CIN1 |
| ECU-77 | . | . | . | . | . | . | . | . | . | . | . | A |  |  | CIN2/3 |
| ECU-78 | . | . | . | . | . | . | . | . | . | . | . | A |  |  | CIN2/3 |
| ECU-79 | . | . | . | . | . | . | . | . | . | . | . | A |  |  | CIN2/3 |
| ECU-80 | . | . | . | . | . | . | . | . | . | . | . | A |  |  | CIN1 |
| ECU-81 | . | . | . | . | . | . | . | . | . | . | . | A |  |  | CIN2/3 |
| ECU-82 | . | . | . | . | . | . | . | . | . | . | . | A |  |  | CIN2/3 |
| ECU-83 | . | . | . | . | . | . | . | . | . | . | . | A |  |  | CIN2/3 |

1. Nucleotide positions of mutations detected within MY09/MY11 L1 region are written vertically across the top. Absence of genetic variations relative to the prototype is marked with points, whereas presence of a variant nucleotide is indicated by the nucleotide corresponding letter. A question mark (?) indicates missing data for the position.
